# Supplementary material for: Comparative Assessment of the Acute Effects of Whey, Rice and Potato Protein Isolate Intake on Markers of Glycaemic Regulation and Appetite in Healthy Males Using a Randomised Study Design
Source: MDPI journal article supplement (doi:10.3390/nu13072157), 2021-06-23

**Figure S1:** CONSORT flow diagram showing number of participants through each stage of the randomised cross-over trial.

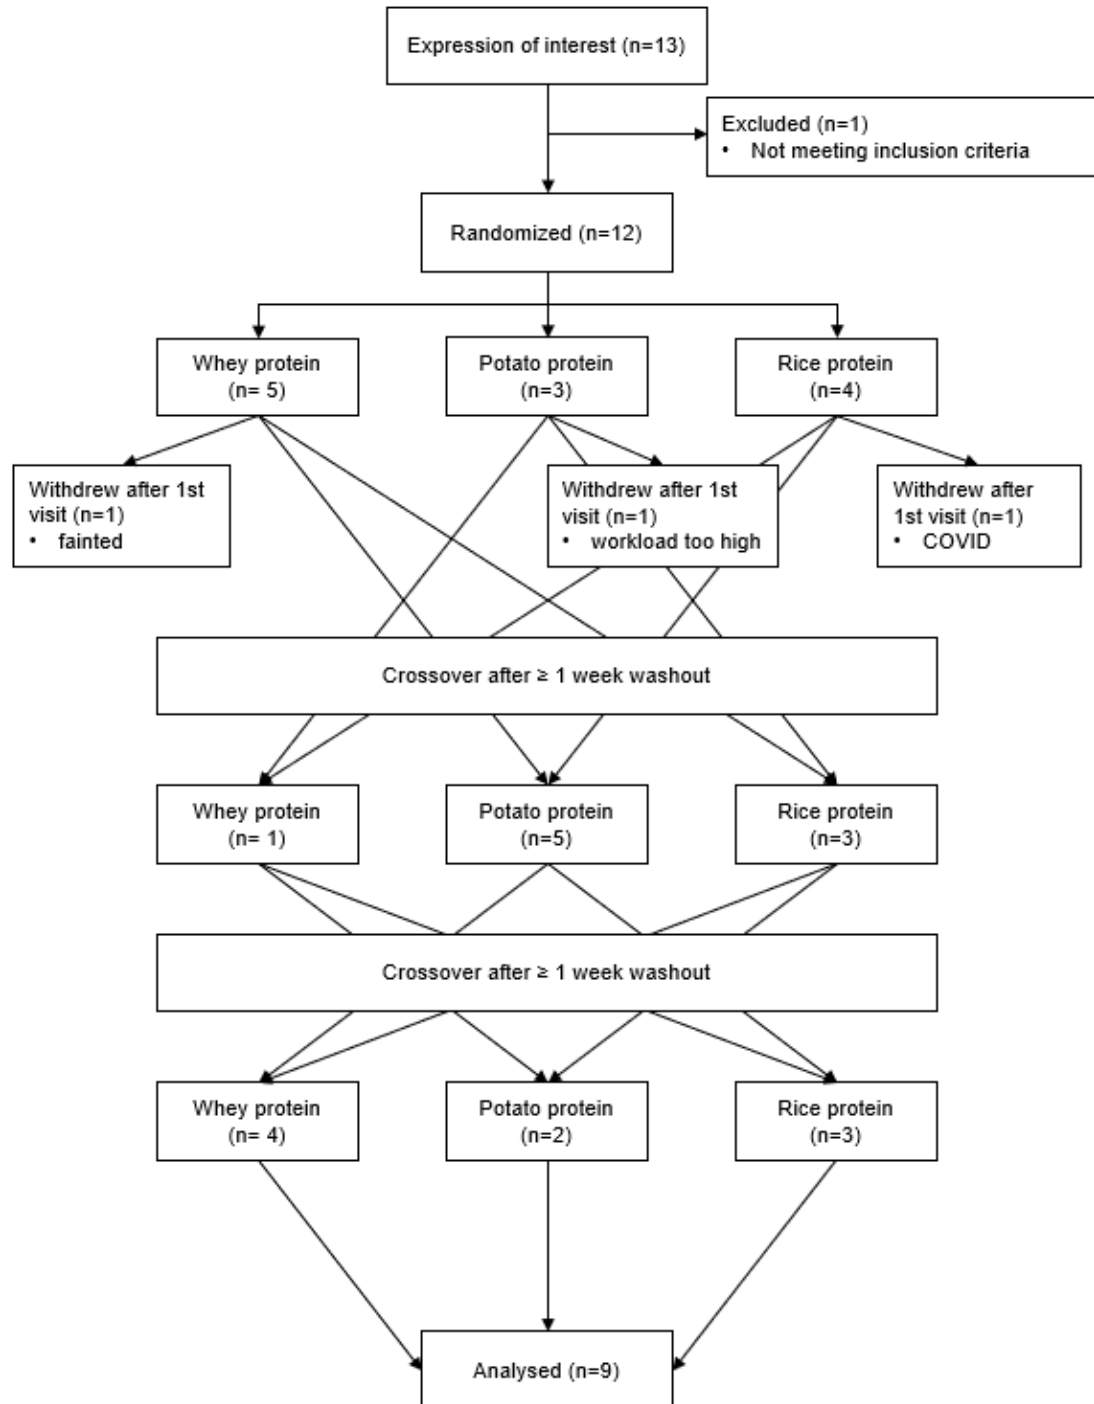

Supplement: s1 [file s1]
